# Supplementary material for: Naturally acquired HPV antibodies against subsequent homotypic infection: A large-scale prospective cohort study
Source: PubMed Central journal article supplement — Lancet Reg Health West Pac. 2021 Jul 16;13:100196. doi: 10.1016/j.lanwpc.2021.100196 (PMC8403914; doi:10.1016/j.lanwpc.2021.100196), 2021-07-16
Supplement: mmc1.pdf [file mmc1.pdf]

**Table S1. Baseline characteristics of the participants in different HPV-16 serostatus groups.**

|                                               | HPV-16<br>Neu (-) | HPV-16<br>Neu (+) | HPV-16<br>IgG (-) | HPV-16<br>IgG (+) | HPV-16<br>Neu (-) IgG (-) | HPV-16<br>Neu (-) IgG (+) | HPV-16<br>Neu (+) IgG (-) | HPV-16<br>Neu (+) IgG (+) |
|-----------------------------------------------|-------------------|-------------------|-------------------|-------------------|---------------------------|---------------------------|---------------------------|---------------------------|
| <b>N</b>                                      | 3199              | 435               | 2560              | 1074              | 2395                      | 804                       | 165                       | 270                       |
| <b>Mean age ± SD (y)</b>                      | 29·9 ± 7·3        | 29·9 ± 7·3        | 30·0 ± 7·4        | 29·7 ± 7·3        | 30·0 ± 7·3                | 29·8 ± 7·3                | 30·2 ± 7·6                | 29·7 ± 7·1                |
| <b>Cytological findings at day 0, n (%) #</b> |                   |                   |                   |                   |                           |                           |                           |                           |
| <b>Normal (NILM)</b>                          | 2971 (92·9)       | 381 (87·6)        | 2370 (92·6)       | 982 (91·4)        | 2221 (92·7)               | 750 (93·3)                | 149 (90·3)                | 232 (85·9)                |
| <b>Abnormal (ASC-US+)</b>                     | 226 (7·1)         | 53 (12·2)         | 189 (7·4)         | 90 (8·4)          | 173 (7·2)                 | 53 (6·6)                  | 16 (9·7)                  | 37 (13·7)                 |
| <b>ASC-US</b>                                 | 148 (4·6)         | 35 (8·0)          | 129 (5·0)         | 54 (5·0)          | 119 (5·0)                 | 29 (3·6)                  | 10 (6·1)                  | 25 (9·3)                  |
| <b>HC2 (-)</b>                                | 93 (2·9)          | 16 (3·7)          | 81 (3·2)          | 28 (2·6)          | 78 (3·3)                  | 15 (1·9)                  | 3 (1·8)                   | 13 (4·8)                  |
| <b>HC2 (+)</b>                                | 55 (1·7)          | 19 (4·4)          | 48 (1·9)          | 26 (2·4)          | 41 (1·7)                  | 14 (1·7)                  | 7 (4·2)                   | 12 (4·4)                  |
| <b>LSIL</b>                                   | 70 (2·2)          | 13 (3·0)          | 53 (2·1)          | 30 (2·8)          | 49 (2·0)                  | 21 (2·6)                  | 4 (2·4)                   | 9 (3·3)                   |
| <b>HSIL</b>                                   | 1 (0·0)           | 4 (0·9)           | 2 (0·1)           | 3 (0·3)           | 1 (0·0)                   | 0 (0)                     | 1 (0·6)                   | 3 (1·1)                   |
| <b>ASC-H</b>                                  | 5 (0·2)           | 1 (0·2)           | 4 (0·2)           | 2 (0·2)           | 3 (0·1)                   | 2 (0·2)                   | 1 (0·6)                   | 0 (0)                     |
| <b>AIS/AGC</b>                                | 2 (0·1)           | 0 (0)             | 1 (0·0)           | 1 (0·1)           | 1 (0·0)                   | 1 (0·1)                   | 0 (0)                     | 0 (0)                     |
| <b>Unsatisfactory</b>                         | 2 (0·1)           | 1 (0·2)           | 1 (0·0)           | 2 (0·2)           | 1 (0·0)                   | 1 (0·1)                   | 0 (0)                     | 1 (0·4)                   |

HPV-16 Neu (-): Seronegative for HPV-16 neutralizing antibodies; HPV-16 Neu (+): Seropositive for HPV-16 neutralizing antibodies; HPV-16 IgG (-): Seronegative for HPV-16 IgG antibodies; HPV-16 IgG (+): Seropositive for HPV-16 IgG antibodies; HPV-16 Neu (-) IgG (-): Seronegative for both HPV-16 neutralizing and IgG antibodies; HPV-16 Neu (-) IgG (+): Seronegative for HPV-16 neutralizing antibodies but seropositive for HPV-16 IgG antibodies; HPV-16 Neu (+) IgG (-): Seropositive for HPV-16 neutralizing antibodies but seronegative for HPV-16 IgG antibodies; HPV-16 Neu (+) IgG (+): Seropositive for both HPV-16 neutralizing and IgG antibodies; # NILM: negative for intraepithelial lesion or malignancy; ASC-US: Atypical squamous cells of undetermined significance; LSIL: low-grade squamous intraepithelial lesion; HSIL: high-grade squamous intraepithelial lesion; ASC-H: atypical squamous cells cannot exclude high-grade lesion; AIS: adenocarcinoma in situ; AGC: atypical glandular cells; HC2 (-): Negative on Hybrid Capture-2 test; HC2 (+): Positive on Hybrid Capture-2 test;

**Table S2. Baseline characteristics of the participants in different HPV-18 serostatus groups.**

|                                               | HPV-18<br>Neu (-) | HPV-18<br>Neu (+) | HPV-18<br>IgG (-) | HPV-18<br>IgG (+) | HPV-18<br>Neu (-) IgG (-) | HPV-18<br>Neu (-) IgG (+) | HPV-18<br>Neu (+) IgG (-) | HPV-18<br>Neu (+) IgG (+) |
|-----------------------------------------------|-------------------|-------------------|-------------------|-------------------|---------------------------|---------------------------|---------------------------|---------------------------|
| <b>N</b>                                      | 3458              | 176               | 3038              | 596               | 2996                      | 462                       | 42                        | 134                       |
| <b>Mean age ± SD (y)</b>                      | 29.9 ± 7.3        | 30.6 ± 7.2        | 29.9 ± 7.4        | 29.9 ± 7.1        | 29.9 ± 7.4                | 29.7 ± 7.1                | 31.1 ± 7.4                | 30.4 ± 7.1                |
| <b>Cytological findings at day 0, n (%) #</b> |                   |                   |                   |                   |                           |                           |                           |                           |
| <b>Normal (NILM)</b>                          | 3197 (92.5)       | 155 (88.1)        | 2820 (92.8)       | 532 (89.3)        | 2782 (92.9)               | 415 (89.8)                | 38 (90.5)                 | 117 (87.3)                |
| <b>Abnormal (ASC-US+)</b>                     | 259 (7.5)         | 20 (11.4)         | 217 (7.1)         | 62 (10.4)         | 213 (7.1)                 | 46 (10.0)                 | 4 (9.5)                   | 16 (11.9)                 |
| <b>ASC-US</b>                                 | 165 (4.8)         | 18 (10.2)         | 144 (4.7)         | 39 (6.5)          | 140 (4.7)                 | 25 (5.4)                  | 4 (9.5)                   | 14 (10.4)                 |
| <b>HC2 (-)</b>                                | 100 (2.9)         | 9 (5.1)           | 92 (3.0)          | 17 (2.9)          | 90 (3.0)                  | 10 (2.2)                  | 2 (4.8)                   | 7 (5.2)                   |
| <b>HC2 (+)</b>                                | 65 (1.9)          | 9 (5.1)           | 52 (1.7)          | 22 (3.7)          | 50 (1.7)                  | 15 (3.2)                  | 2 (4.8)                   | 7 (5.2)                   |
| <b>LSIL</b>                                   | 81 (2.3)          | 2 (1.1)           | 63 (2.1)          | 20 (3.4)          | 63 (2.1)                  | 18 (3.9)                  | 0 (0)                     | 2 (1.5)                   |
| <b>HSIL</b>                                   | 5 (0.1)           | 0 (0)             | 4 (0.1)           | 1 (0.2)           | 4 (0.1)                   | 1 (0.2)                   | 0 (0)                     | 0 (0)                     |
| <b>ASC-H</b>                                  | 6 (0.2)           | 0 (0)             | 4 (0.1)           | 2 (0.3)           | 4 (0.1)                   | 2 (0.4)                   | 0 (0)                     | 0 (0)                     |
| <b>AIS/AGC</b>                                | 2 (0.1)           | 0 (0)             | 2 (0.1)           | 0 (0)             | 2 (0.1)                   | 0 (0)                     | 0 (0)                     | 0 (0)                     |
| <b>Unsatisfactory</b>                         | 2 (0.1)           | 1 (0.6)           | 1 (0.0)           | 2 (0.3)           | 1 (0.0)                   | 1 (0.2)                   | 0 (0)                     | 1 (0.7)                   |

HPV-18 Neu (-): Seronegative for HPV-18 neutralizing antibodies; HPV-18 Neu (+): Seropositive for HPV-18 neutralizing antibodies; HPV-18 IgG (-): Seronegative for HPV-18 IgG antibodies; HPV-18 IgG (+): Seropositive for HPV-18 IgG antibodies; HPV-18 Neu (-) IgG (-): Seronegative for both HPV-18 neutralizing and IgG antibodies; HPV-18 Neu (-) IgG (+): Seronegative for HPV-18 neutralizing antibodies but seropositive for HPV-18 IgG antibodies; HPV-18 Neu (+) IgG (-): Seropositive for HPV-18 neutralizing antibodies but seronegative for HPV-18 IgG antibodies; HPV-18 Neu (+) IgG (+): Seropositive for both HPV-18 neutralizing and IgG antibodies; # NILM: negative for intraepithelial lesion or malignancy; ASC-US: Atypical squamous cells of undetermined significance; LSIL: low-grade squamous intraepithelial lesion; HSIL: high-grade squamous intraepithelial lesion; ASC-H: atypical squamous cells cannot exclude high-grade lesion; AIS: adenocarcinoma in situ; AGC: atypical glandular cells; HC2 (-): Negative on Hybrid Capture-2 test; HC2 (+): Positive on Hybrid Capture-2 test;

**Table S3. The risk of newly detected HPV-16/18 infection in strata of HPV-16/18 neutralizing antibodies and IgG antibodies with different cut-off values of IgG antibodies.**

| HPV-16/18 serostatus *                         | No. of subjects | Person -years | No. of events | HPV-16/18 incidence (95% CI) per 100 person-years | Hazard ratio (95%CI) | P Value | Adjusted Hazard ratio (95% CI) # | P Value # |
|------------------------------------------------|-----------------|---------------|---------------|---------------------------------------------------|----------------------|---------|----------------------------------|-----------|
| <b>Endpoint: incident infection</b>            |                 |               |               |                                                   |                      |         |                                  |           |
| <b>Cut-off (Q1): HPV-16: 4·4; HPV-18: 2·8</b>  |                 |               |               |                                                   |                      |         |                                  |           |
| Neu (-) IgG (-)                                | 2208            | 11,179        | 190           | 1·70 (1·47, 1·96)                                 | 1·00                 | ..      | 1·00                             | ..        |
| Neu (-) IgG (+)                                | 843             | 4288          | 45            | 1·05 (0·78, 1·41)                                 | 0·62 (0·45, 0·86)    | 0·0044  | 0·62 (0·45, 0·86)                | 0·0038    |
| Neu (+) IgG (-)                                | 226             | 1147          | 5             | 0·44 (0·18, 1·05)                                 | 0·27 (0·11, 0·65)    | 0·0034  | 0·27 (0·11, 0·65)                | 0·0037    |
| Neu (+) IgG (+)                                | 285             | 1452          | 11            | 0·76 (0·42, 1·37)                                 | 0·45 (0·24, 0·82)    | 0·0095  | 0·45 (0·25, 0·83)                | 0·0099    |
| <b>Cut-off (Q2): HPV-16: 6·6; HPV-18: 4·0</b>  |                 |               |               |                                                   |                      |         |                                  |           |
| Neu (-) IgG (-)                                | 2504            | 12,639        | 215           | 1·70 (1·49, 1·94)                                 | 1·00                 | ..      | 1·00                             | ..        |
| Neu (-) IgG (+)                                | 516             | 2660          | 22            | 0·83 (0·54, 1·26)                                 | 0·49 (0·32, 0·76)    | 0·0014  | 0·49 (0·31, 0·76)                | 0·0013    |
| Neu (+) IgG (-)                                | 288             | 1470          | 5             | 0·34 (0·14, 0·82)                                 | 0·21 (0·09, 0·50)    | 0·0005  | 0·21 (0·09, 0·50)                | 0·0005    |
| Neu (+) IgG (+)                                | 227             | 1150          | 11            | 0·96 (0·53, 1·73)                                 | 0·56 (0·31, 1·03)    | 0·0629  | 0·57 (0·31, 1·05)                | 0·0695    |
| <b>Cut-off (Q3): HPV-16: 10·1; HPV-18: 7·6</b> |                 |               |               |                                                   |                      |         |                                  |           |
| Neu (-) IgG (-)                                | 2751            | 13,898        | 235           | 1·69 (1·49, 1·92)                                 | 1·00                 | ..      | 1·00                             | ..        |
| Neu (-) IgG (+)                                | 242             | 1241          | 9             | 0·73 (0·38, 1·39)                                 | 0·43 (0·22, 0·84)    | 0·0134  | 0·44 (0·23, 0·85)                | 0·0148    |
| Neu (+) IgG (-)                                | 362             | 1859          | 6             | 0·32 (0·15, 0·72)                                 | 0·20 (0·09, 0·44)    | <0001   | 0·20 (0·09, 0·45)                | <0001     |
| Neu (+) IgG (+)                                | 146             | 723           | 10            | 1·38 (0·74, 2·57)                                 | 0·80 (0·43, 1·51)    | 0·4908  | 0·81 (0·43, 1·53)                | 0·5168    |
| <b>Endpoint: 6-month persistent infection</b>  |                 |               |               |                                                   |                      |         |                                  |           |
| <b>Cut-off (Q1): HPV-16: 4·4; HPV-18: 2·8</b>  |                 |               |               |                                                   |                      |         |                                  |           |
| Neu (-) IgG (-)                                | 2171            | 11,397        | 55            | 0·48 (0·37, 0·63)                                 | 1·00                 | ..      | 1·00                             | ..        |
| Neu (-) IgG (+)                                | 834             | 4349          | 15            | 0·34 (0·21, 0·57)                                 | 0·71 (0·40, 1·26)    | 0·2418  | 0·71 (0·40, 1·25)                | 0·2371    |
| Neu (+) IgG (-)                                | 221             | 1162          | 1             | 0·09 (0·01, 0·61)                                 | 0·18 (0·03, 1·28)    | 0·0866  | 0·18 (0·03, 1·29)                | 0·0879    |
| Neu (+) IgG (+)                                | 276             | 1471          | 1             | 0·07 (0·01, 0·48)                                 | 0·14 (0·02, 1·01)    | 0·0516  | 0·14 (0·02, 1·02)                | 0·0522    |
| <b>Cut-off (Q2): HPV-16: 6·6; HPV-18: 4·0</b>  |                 |               |               |                                                   |                      |         |                                  |           |
| Neu (-) IgG (-)                                | 2462            | 12,889        | 66            | 0·51 (0·40, 0·65)                                 | 1·00                 | ..      | 1·00                             | ..        |
| Neu (-) IgG (+)                                | 513             | 2701          | 6             | 0·22 (0·10, 0·49)                                 | 0·43 (0·19, 1·00)    | 0·0491  | 0·43 (0·19, 1·00)                | 0·0492    |
| Neu (+) IgG (-)                                | 281             | 1482          | 1             | 0·07 (0·01, 0·48)                                 | 0·13 (0·02, 0·95)    | 0·0438  | 0·13 (0·02, 0·95)                | 0·0445    |
| Neu (+) IgG (+)                                | 220             | 1171          | 1             | 0·09 (0·01, 0·61)                                 | 0·17 (0·02, 1·20)    | 0·0750  | 0·17 (0·02, 1·22)                | 0·0782    |
| <b>Cut-off (Q3): HPV-16: 10·1; HPV-18: 7·6</b> |                 |               |               |                                                   |                      |         |                                  |           |
| Neu (-) IgG (-)                                | 2707            | 14,184        | 70            | 0·49 (0·39, 0·62)                                 | 1·00                 | ..      | 1·00                             | ..        |
| Neu (-) IgG (+)                                | 241             | 1260          | 3             | 0·24 (0·08, 0·74)                                 | 0·48 (0·15, 1·53)    | 0·2139  | 0·49 (0·15, 1·55)                | 0·2231    |
| Neu (+) IgG (-)                                | 354             | 1873          | 1             | 0·05 (0·01, 0·38)                                 | 0·11 (0·02, 0·78)    | 0·0270  | 0·11 (0·02, 0·79)                | 0·0278    |
| Neu (+) IgG (+)                                | 140             | 743           | 1             | 0·13 (0·02, 0·96)                                 | 0·27 (0·04, 1·96)    | 0·1969  | 0·28 (0·04, 2·00)                | 0·2026    |
| <b>Endpoint: 12-month persistent infection</b> |                 |               |               |                                                   |                      |         |                                  |           |
| <b>Cut-off (Q1): HPV-16: 4·4; HPV-18: 2·8</b>  |                 |               |               |                                                   |                      |         |                                  |           |
| Neu (-) IgG (-)                                | 2149            | 11,417        | 39            | 0·34 (0·25, 0·47)                                 | 1·00                 | ..      | 1·00                             | ..        |
| Neu (-) IgG (+)                                | 826             | 4352          | 12            | 0·28 (0·16, 0·49)                                 | 0·80 (0·42, 1·53)    | 0·5074  | 0·80 (0·42, 1·53)                | 0·4998    |
| Neu (+) IgG (-)                                | 219             | 1160          | 1             | 0·09 (0·01, 0·61)                                 | 0·25 (0·04, 1·83)    | 0·1729  | 0·25 (0·04, 1·85)                | 0·1755    |
| Neu (+) IgG (+)                                | 273             | 1464          | 1             | 0·07 (0·01, 0·48)                                 | 0·20 (0·03, 1·45)    | 0·1108  | 0·20 (0·03, 1·46)                | 0·1119    |

| HPV-16/18 serostatus *                         | No. of subjects | Person -years | No. of events | HPV-16/18 incidence (95% CI) per 100 person-years | Hazard ratio (95%CI) | P Value | Adjusted Hazard ratio (95% CI) # | P Value # |
|------------------------------------------------|-----------------|---------------|---------------|---------------------------------------------------|----------------------|---------|----------------------------------|-----------|
| <b>Cut-off (Q2): HPV-16: 6·6; HPV-18: 4·0</b>  |                 |               |               |                                                   |                      |         |                                  |           |
| Neu (-) IgG (-)                                | 2437            | 12,923        | 45            | 0·35 (0·26, 0·47)                                 | 1·00                 | ..      | 1·00                             | ..        |
| Neu (-) IgG (+)                                | 508             | 2700          | 5             | 0·19 (0·08, 0·44)                                 | 0·53 (0·21, 1·33)    | 0·1767  | 0·53 (0·21, 1·33)                | 0·1774    |
| Neu (+) IgG (-)                                | 278             | 1477          | 1             | 0·07 (0·01, 0·48)                                 | 0·19 (0·03, 1·41)    | 0·1047  | 0·20 (0·03, 1·42)                | 0·1067    |
| Neu (+) IgG (+)                                | 217             | 1164          | 1             | 0·09 (0·01, 0·61)                                 | 0·25 (0·03, 1·78)    | 0·1646  | 0·25 (0·04, 1·83)                | 0·1724    |
| <b>Cut-off (Q3): HPV-16: 10·1; HPV-18: 7·6</b> |                 |               |               |                                                   |                      |         |                                  |           |
| Neu (-) IgG (-)                                | 2680            | 14,219        | 48            | 0·34 (0·25, 0·45)                                 | 1·00                 | ..      | 1·00                             | ..        |
| Neu (-) IgG (+)                                | 238             | 1258          | 3             | 0·24 (0·08, 0·74)                                 | 0·70 (0·22, 2·26)    | 0·5536  | 0·72 (0·22, 2·30)                | 0·5730    |
| Neu (+) IgG (-)                                | 351             | 1867          | 1             | 0·05 (0·01, 0·38)                                 | 0·16 (0·02, 1·15)    | 0·0679  | 0·16 (0·02, 1·16)                | 0·0700    |
| Neu (+) IgG (+)                                | 138             | 739           | 1             | 0·14 (0·02, 0·96)                                 | 0·40 (0·06, 2·90)    | 0·3640  | 0·41 (0·06, 2·95)                | 0·3744    |

\* Neu (-) IgG (-): Seronegative for both HPV-16 neutralizing and IgG antibodies and seronegative for both HPV-18 neutralizing and IgG antibodies; Neu (-) IgG (+): Seronegative for HPV-16 neutralizing antibodies but seropositive for HPV-16 IgG antibodies and/or seronegative for HPV-18 neutralizing antibodies but seropositive for HPV-18 IgG antibodies; Neu (+) IgG (-): Seropositive for HPV-16 neutralizing antibodies but seronegative for HPV-16 IgG antibodies and/or seropositive for HPV-18 neutralizing antibodies but seronegative for HPV-18 IgG antibodies; Neu (+) IgG (+): Seropositive for both HPV-16 neutralizing and IgG antibodies and/or seropositive for both HPV-18 neutralizing and IgG antibodies. #Adjusted for continuous age at enrolment.

**Table S4. The risk of newly detected HPV-18 infection according to HPV-18 serostatus.**

| HPV-18 serostatus*                             | No. of subject | Person -years | No. of events | HPV-18 incidence (95%CI) per 100 person-years | Hazard ratio (95%CI) | P Value | Adjusted Hazard ratio (95% CI) # | P Value # |
|------------------------------------------------|----------------|---------------|---------------|-----------------------------------------------|----------------------|---------|----------------------------------|-----------|
| <b>Endpoint: incident infection</b>            |                |               |               |                                               |                      |         |                                  |           |
| Neu (-)                                        | 3358           | 17,281        | 134           | 0.78 (0.65, 0.92)                             | 1.00                 | ..      | 1.00                             | ..        |
| Neu (+)                                        | 161            | 837           | 2             | 0.24 (0.06, 0.96)                             | 0.31 (0.08, 1.27)    | 0.1043  | 0.32 (0.08, 1.30)                | 0.1111    |
| IgG (-)                                        | 2958           | 15,236        | 119           | 0.78 (0.65, 0.93)                             | 1.00                 | ..      | 1.00                             | ..        |
| IgG (+)                                        | 561            | 2881          | 17            | 0.59 (0.37, 0.95)                             | 0.77 (0.46, 1.28)    | 0.3057  | 0.76 (0.46, 1.27)                | 0.2998    |
| Neu (-) IgG (-)                                | 2920           | 15,047        | 119           | 0.79 (0.66, 0.95)                             | 1.00                 | ..      | 1.00                             | ..        |
| Neu (-) IgG (+)                                | 438            | 2235          | 15            | 0.67 (0.40, 1.11)                             | 0.86 (0.50, 1.48)    | 0.5899  | 0.86 (0.50, 1.47)                | 0.5709    |
| Neu (+) IgG (-)                                | 38             | 190           | 0             | 0.00 (0.00, NA)                               | NA                   | NA      | NA                               | NA        |
| Neu (+) IgG (+)                                | 123            | 647           | 2             | 0.31 (0.08, 1.24)                             | 0.40 (0.10, 1.60)    | 0.1935  | 0.40 (0.10, 1.62)                | 0.2006    |
| <b>Endpoint: 6-month persistent infection</b>  |                |               |               |                                               |                      |         |                                  |           |
| Neu (-)                                        | 3300           | 17,387        | 35            | 0.20 (0.14, 0.28)                             | 1.00                 | ..      | 1.00                             | ..        |
| Neu (+)                                        | 158            | 837           | 0             | 0.00 (0.00, NA)                               | NA                   | NA      | NA                               | NA        |
| IgG (-)                                        | 2902           | 15,324        | 28            | 0.18 (0.13, 0.26)                             | 1.00                 | ..      | 1.00                             | ..        |
| IgG (+)                                        | 556            | 2900          | 7             | 0.24 (0.12, 0.51)                             | 1.31 (0.57, 3.00)    | 0.5219  | 1.31 (0.57, 3.00)                | 0.5229    |
| Neu (-) IgG (-)                                | 2865           | 15,135        | 28            | 0.19 (0.13, 0.27)                             | 1.00                 | ..      | 1.00                             | ..        |
| Neu (-) IgG (+)                                | 435            | 2252          | 7             | 0.31 (0.15, 0.65)                             | 1.66 (0.73, 3.81)    | 0.2286  | 1.66 (0.73, 3.80)                | 0.2301    |
| Neu (+) IgG (-)                                | 37             | 189           | 0             | 0.00 (0.00, NA)                               | NA                   | NA      | NA                               | NA        |
| Neu (+) IgG (+)                                | 121            | 648           | 0             | 0.00 (0.00, NA)                               | NA                   | NA      | NA                               | NA        |
| <b>Endpoint: 12-month persistent infection</b> |                |               |               |                                               |                      |         |                                  |           |
| Neu (-)                                        | 3267           | 17,379        | 23            | 0.13 (0.09, 0.20)                             | 1.00                 | ..      | 1.00                             | ..        |
| Neu (+)                                        | 156            | 833           | 0             | 0.00 (0.00, NA)                               | NA                   | NA      | NA                               | NA        |
| IgG (-)                                        | 2871           | 15,310        | 18            | 0.12 (0.07, 0.19)                             | 1.00                 | ..      | 1.00                             | ..        |
| IgG (+)                                        | 552            | 2901          | 5             | 0.17 (0.07, 0.41)                             | 1.46 (0.54, 3.93)    | 0.4551  | 1.46 (0.54, 3.93)                | 0.4561    |
| Neu (-) IgG (-)                                | 2835           | 15,122        | 18            | 0.12 (0.07, 0.19)                             | 1.00                 | ..      | 1.00                             | ..        |
| Neu (-) IgG (+)                                | 432            | 2257          | 5             | 0.22 (0.09, 0.53)                             | 1.85 (0.69, 4.98)    | 0.2238  | 1.85 (0.69, 4.97)                | 0.2254    |
| Neu (+) IgG (-)                                | 36             | 188           | 0             | 0.00 (0.00, NA)                               | NA                   | NA      | NA                               | NA        |
| Neu (+) IgG (+)                                | 120            | 645           | 0             | 0.00 (0.00, NA)                               | NA                   | NA      | NA                               | NA        |

\* Neu (-): Seronegative for HPV-18 neutralizing antibodies; Neu (+): Seropositive for HPV-18 neutralizing antibodies; IgG (-): Seronegative for HPV-18 IgG antibodies; IgG (+): Seropositive for HPV-18 IgG antibodies; Neu (-) IgG (-): Seronegative for both HPV-18 neutralizing and IgG antibodies; Neu (-) IgG (+): Seronegative for HPV-18 neutralizing antibodies but seropositive for HPV-18 IgG antibodies; Neu (+) IgG (-): Seropositive for HPV-18 neutralizing antibodies but seronegative for HPV-18 IgG antibodies; Neu (+) IgG (+): Seropositive for both HPV-18 neutralizing and IgG antibodies;

# Adjusted for continuous age at enrolment.

NA: Not available;

1 **Table S5. The risk of newly detected HPV-16 infection according to HPV-16 IgG serostatus**  
 2 **depended on different cut-off values.**

| HPV-16 serostatus *                            | No. of subjects | Person-years | No. of events | HPV-16 incidence (95% CI) per 100 person-years | Hazard ratio (95%CI) | P Value | Adjusted Hazard ratio (95% CI) # | P Value # |
|------------------------------------------------|-----------------|--------------|---------------|------------------------------------------------|----------------------|---------|----------------------------------|-----------|
| <b>Endpoint: incident infection</b>            |                 |              |               |                                                |                      |         |                                  |           |
| <b>Cut-off (Q1): 4·4</b>                       |                 |              |               |                                                |                      |         |                                  |           |
| HPV-16 IgG (-)                                 | 2680            | 13,720       | 149           | 1·09 (0·92, 1·28)                              | 1·00                 | ..      | 1·00                             | ..        |
| HPV-16 IgG (+)                                 | 796             | 4023         | 44            | 1·09 (0·81, 1·47)                              | 1·01 (0·72, 1·42)    | 0·9508  | 1·00 (0·72, 1·41)                | 0·9801    |
| <b>Cut-off (Q2): 6·6</b>                       |                 |              |               |                                                |                      |         |                                  |           |
| HPV-16 IgG (-)                                 | 2963            | 15,141       | 167           | 1·11 (0·95, 1·28)                              | 1·00                 | ..      | 1·00                             | ..        |
| HPV-16 IgG (+)                                 | 513             | 2602         | 26            | 1·00 (0·68, 1·47)                              | 0·91 (0·60, 1·37)    | 0·6357  | 0·91 (0·60, 1·37)                | 0·6397    |
| <b>Cut-off (Q3): 10·1</b>                      |                 |              |               |                                                |                      |         |                                  |           |
| HPV-16 IgG (-)                                 | 3212            | 16,427       | 179           | 1·09 (0·94, 1·26)                              | 1·00                 | ..      | 1·00                             | ..        |
| HPV-16 IgG (+)                                 | 264             | 1316         | 14            | 1·06 (0·63, 1·80)                              | 0·97 (0·56, 1·67)    | 0·9065  | 0·99 (0·57, 1·70)                | 0·9633    |
| <b>Endpoint: 6-month persistent infection</b>  |                 |              |               |                                                |                      |         |                                  |           |
| <b>Cut-off (Q1): 4·4</b>                       |                 |              |               |                                                |                      |         |                                  |           |
| HPV-16 IgG (-)                                 | 2637            | 13,841       | 51            | 0·37 (0·28, 0·48)                              | 1·00                 | ..      | 1·00                             | ..        |
| HPV-16 IgG (+)                                 | 780             | 4082         | 10            | 0·24 (0·13, 0·46)                              | 0·66 (0·34, 1·31)    | 0·2348  | 0·66 (0·34, 1·30)                | 0·2323    |
| <b>Cut-off (Q2): 6·6</b>                       |                 |              |               |                                                |                      |         |                                  |           |
| HPV-16 IgG (-)                                 | 2912            | 15,269       | 57            | 0·37 (0·29, 0·48)                              | 1·00                 | ..      | 1·00                             | ..        |
| HPV-16 IgG (+)                                 | 505             | 2655         | 4             | 0·15 (0·06, 0·40)                              | 0·40 (0·15, 1·11)    | 0·0790  | 0·41 (0·15, 1·12)                | 0·0803    |
| <b>Cut-off (Q3): 10·1</b>                      |                 |              |               |                                                |                      |         |                                  |           |
| HPV-16 IgG (-)                                 | 3160            | 16,578       | 59            | 0·36 (0·28, 0·46)                              | 1·00                 | ..      | 1·00                             | ..        |
| HPV-16 IgG (+)                                 | 257             | 1345         | 2             | 0·15 (0·04, 0·59)                              | 0·42 (0·10, 1·71)    | 0·2234  | 0·42 (0·10, 1·74)                | 0·2332    |
| <b>Endpoint: 12-month persistent infection</b> |                 |              |               |                                                |                      |         |                                  |           |
| <b>Cut-off (Q1): 4·4</b>                       |                 |              |               |                                                |                      |         |                                  |           |
| HPV-16 IgG (-)                                 | 2612            | 13,859       | 34            | 0·25 (0·18, 0·34)                              | 1·00                 | ..      | 1·00                             | ..        |
| HPV-16 IgG (+)                                 | 770             | 4074         | 8             | 0·20 (0·10, 0·39)                              | 0·80 (0·37, 1·72)    | 0·5657  | 0·80 (0·37, 1·72)                | 0·5647    |
| <b>Cut-off (Q2): 6·6</b>                       |                 |              |               |                                                |                      |         |                                  |           |
| HPV-16 IgG (-)                                 | 2885            | 15,288       | 39            | 0·26 (0·19, 0·35)                              | 1·00                 | ..      | 1·00                             | ..        |
| HPV-16 IgG (+)                                 | 497             | 2645         | 3             | 0·11 (0·04, 0·35)                              | 0·44 (0·14, 1·44)    | 0·1750  | 0·44 (0·14, 1·44)                | 0·1757    |
| <b>Cut-off (Q3): 10·1</b>                      |                 |              |               |                                                |                      |         |                                  |           |
| HPV-16 IgG (-)                                 | 3130            | 16,594       | 40            | 0·24 (0·18, 0·33)                              | 1·00                 | ..      | 1·00                             | ..        |
| HPV-16 IgG (+)                                 | 252             | 1339         | 2             | 0·15 (0·04, 0·60)                              | 0·62 (0·15, 2·56)    | 0·5060  | 0·62 (0·15, 2·57)                | 0·5110    |

3 \* IgG (-): Seronegative for HPV-16 IgG antibodies; IgG (+): Seropositive for HPV-16 IgG antibodies;

4 # Adjusted for continuous age at enrolment.

**Table S6. The risk of newly detected HPV-16 infection in strata of HPV-16 neutralizing antibodies and IgG antibodies with different cut-off values of IgG antibodies.**

| HPV-16 serostatus *                            | No. of subjects | Person-years | No. of events | HPV-16 incidence (95% CI) per 100 person-years | Hazard ratio (95% CI) | P Value | Adjusted Hazard ratio (95% CI) # | P Value # |
|------------------------------------------------|-----------------|--------------|---------------|------------------------------------------------|-----------------------|---------|----------------------------------|-----------|
| <b>Endpoint: incident infection</b>            |                 |              |               |                                                |                       |         |                                  |           |
| <b>Cut-off (Q1): 4·4</b>                       |                 |              |               |                                                |                       |         |                                  |           |
| Neu (-) IgG (-)                                | 2498            | 12,794       | 144           | 1·13 (0·96, 1·33)                              | 1·00                  | ..      | 1·00                             | ..        |
| Neu (-) IgG (+)                                | 602             | 3061         | 34            | 1·11 (0·79, 1·55)                              | 0·99 (0·68, 1·44)     | 0·9712  | 0·99 (0·68, 1·43)                | 0·9382    |
| Neu (+) IgG (-)                                | 182             | 926          | 5             | 0·54 (0·22, 1·30)                              | 0·50 (0·21, 1·22)     | 0·1267  | 0·51 (0·21, 1·23)                | 0·1332    |
| Neu (+) IgG (+)                                | 194             | 961          | 10            | 1·04 (0·56, 1·93)                              | 0·93 (0·49, 1·76)     | 0·8203  | 0·93 (0·49, 1·77)                | 0·8264    |
| <b>Cut-off (Q2): 6·6</b>                       |                 |              |               |                                                |                       |         |                                  |           |
| Neu (-) IgG (-)                                | 2735            | 13,978       | 162           | 1·16 (0·99, 1·35)                              | 1·00                  | ..      | 1·00                             | ..        |
| Neu (-) IgG (+)                                | 365             | 1876         | 16            | 0·85 (0·52, 1·39)                              | 0·74 (0·44, 1·24)     | 0·2489  | 0·74 (0·44, 1·23)                | 0·2459    |
| Neu (+) IgG (-)                                | 228             | 1162         | 5             | 0·43 (0·18, 1·03)                              | 0·39 (0·16, 0·94)     | 0·0360  | 0·39 (0·16, 0·95)                | 0·0373    |
| Neu (+) IgG (+)                                | 148             | 726          | 10            | 1·38 (0·74, 2·56)                              | 1·18 (0·62, 2·24)     | 0·6073  | 1·20 (0·63, 2·27)                | 0·5838    |
| <b>Cut-off (Q3): 10·1</b>                      |                 |              |               |                                                |                       |         |                                  |           |
| Neu (-) IgG (-)                                | 2932            | 14,996       | 173           | 1·15 (0·99, 1·34)                              | 1·00                  | ..      | 1·00                             | ..        |
| Neu (-) IgG (+)                                | 168             | 859          | 5             | 0·58 (0·24, 1·40)                              | 0·51 (0·21, 1·23)     | 0·1326  | 0·52 (0·21, 1·26)                | 0·1453    |
| Neu (+) IgG (-)                                | 280             | 1431         | 6             | 0·42 (0·19, 0·93)                              | 0·38 (0·17, 0·85)     | 0·0186  | 0·38 (0·17, 0·86)                | 0·0194    |
| Neu (+) IgG (+)                                | 96              | 457          | 9             | 1·97 (1·03, 3·79)                              | 1·67 (0·86, 3·27)     | 0·1325  | 1·71 (0·87, 3·33)                | 0·1191    |
| <b>Endpoint: 6-month persistent infection</b>  |                 |              |               |                                                |                       |         |                                  |           |
| <b>Cut-off (Q1): 4·4</b>                       |                 |              |               |                                                |                       |         |                                  |           |
| Neu (-) IgG (-)                                | 2460            | 12,905       | 50            | 0·39 (0·29, 0·51)                              | 1·00                  | ..      | 1·00                             | ..        |
| Neu (-) IgG (+)                                | 594             | 3099         | 9             | 0·29 (0·15, 0·56)                              | 0·75 (0·37, 1·52)     | 0·4201  | 0·74 (0·37, 1·51)                | 0·4143    |
| Neu (+) IgG (-)                                | 177             | 936          | 1             | 0·11 (0·02, 0·76)                              | 0·27 (0·04, 1·99)     | 0·2005  | 0·28 (0·04, 2·01)                | 0·2040    |
| Neu (+) IgG (+)                                | 186             | 983          | 1             | 0·10 (0·01, 0·72)                              | 0·26 (0·04, 1·89)     | 0·1843  | 0·26 (0·04, 1·91)                | 0·1862    |
| <b>Cut-off (Q2): 6·6</b>                       |                 |              |               |                                                |                       |         |                                  |           |
| Neu (-) IgG (-)                                | 2691            | 14,099       | 56            | 0·40 (0·31, 0·52)                              | 1·00                  | ..      | 1·00                             | ..        |
| Neu (-) IgG (+)                                | 363             | 1905         | 3             | 0·16 (0·05, 0·49)                              | 0·40 (0·12, 1·26)     | 0·1176  | 0·40 (0·12, 1·27)                | 0·1180    |
| Neu (+) IgG (-)                                | 221             | 1170         | 1             | 0·09 (0·01, 0·61)                              | 0·21 (0·03, 1·55)     | 0·1267  | 0·22 (0·03, 1·56)                | 0·1281    |
| Neu (+) IgG (+)                                | 142             | 750          | 1             | 0·13 (0·02, 0·95)                              | 0·34 (0·05, 2·42)     | 0·2790  | 0·34 (0·05, 2·46)                | 0·2847    |
| <b>Cut-off (Q3): 10·1</b>                      |                 |              |               |                                                |                       |         |                                  |           |
| Neu (-) IgG (-)                                | 2887            | 15,134       | 58            | 0·38 (0·30, 0·50)                              | 1·00                  | ..      | 1·00                             | ..        |
| Neu (-) IgG (+)                                | 167             | 870          | 1             | 0·11 (0·02, 0·82)                              | 0·30 (0·04, 2·15)     | 0·2304  | 0·30 (0·04, 2·19)                | 0·2370    |
| Neu (+) IgG (-)                                | 273             | 1444         | 1             | 0·07 (0·01, 0·49)                              | 0·18 (0·03, 1·30)     | 0·0889  | 0·18 (0·03, 1·31)                | 0·0899    |
| Neu (+) IgG (+)                                | 90              | 476          | 1             | 0·21 (0·03, 1·49)                              | 0·55 (0·08, 3·97)     | 0·5528  | 0·56 (0·08, 4·05)                | 0·5662    |
| <b>Endpoint: 12-month persistent infection</b> |                 |              |               |                                                |                       |         |                                  |           |
| <b>Cut-off (Q1): 4·4</b>                       |                 |              |               |                                                |                       |         |                                  |           |
| Neu (-) IgG (-)                                | 2436            | 12,923       | 33            | 0·26 (0·18, 0·36)                              | 1·00                  | ..      | 1·00                             | ..        |
| Neu (-) IgG (+)                                | 587             | 3098         | 7             | 0·23 (0·11, 0·47)                              | 0·88 (0·39, 1·99)     | 0·7629  | 0·88 (0·39, 1·99)                | 0·7610    |
| Neu (+) IgG (-)                                | 176             | 935          | 1             | 0·11 (0·02, 0·76)                              | 0·42 (0·06, 3·05)     | 0·3893  | 0·42 (0·06, 3·06)                | 0·3910    |
| Neu (+) IgG (+)                                | 183             | 976          | 1             | 0·10 (0·01, 0·73)                              | 0·40 (0·06, 2·92)     | 0·3665  | 0·40 (0·06, 2·93)                | 0·3675    |

| HPV-16 serostatus *       | No. of subjects | Person-years | No. of events | HPV-16 incidence (95% CI) per 100 person-years | Hazard ratio (95% CI) | P Value | Adjusted Hazard ratio (95% CI) # | P Value # |
|---------------------------|-----------------|--------------|---------------|------------------------------------------------|-----------------------|---------|----------------------------------|-----------|
| <b>Cut-off (Q2): 6·6</b>  |                 |              |               |                                                |                       |         |                                  |           |
| Neu (-) IgG (-)           | 2665            | 14,119       | 38            | 0·27 (0·20, 0·37)                              | 1·00                  | ..      | 1·00                             | ..        |
| Neu (-) IgG (+)           | 358             | 1902         | 2             | 0·11 (0·03, 0·42)                              | 0·39 (0·09, 1·62)     | 0·1939  | 0·39 (0·09, 1·62)                | 0·1941    |
| Neu (+) IgG (-)           | 220             | 1169         | 1             | 0·09 (0·01, 0·61)                              | 0·32 (0·04, 2·31)     | 0·2567  | 0·32 (0·04, 2·31)                | 0·2574    |
| Neu (+) IgG (+)           | 139             | 743          | 1             | 0·13 (0·02, 0·96)                              | 0·50 (0·07, 3·64)     | 0·4928  | 0·50 (0·07, 3·65)                | 0·4953    |
| <b>Cut-off (Q3): 10·1</b> |                 |              |               |                                                |                       |         |                                  |           |
| Neu (-) IgG (-)           | 2859            | 15,155       | 39            | 0·26 (0·19, 0·35)                              | 1·00                  | ..      | 1·00                             | ..        |
| Neu (-) IgG (+)           | 164             | 867          | 1             | 0·12 (0·02, 0·82)                              | 0·45 (0·06, 3·25)     | 0·4252  | 0·45 (0·06, 3·26)                | 0·4281    |
| Neu (+) IgG (-)           | 271             | 1439         | 1             | 0·07 (0·01, 0·49)                              | 0·27 (0·04, 1·96)     | 0·1947  | 0·27 (0·04, 1·96)                | 0·1953    |
| Neu (+) IgG (+)           | 88              | 472          | 1             | 0·21 (0·03, 1·50)                              | 0·82 (0·11, 5·99)     | 0·8468  | 0·83 (0·11, 6·02)                | 0·8510    |

\* Neu (-) IgG (-): Seronegative for both HPV-16 neutralizing and IgG antibodies; Neu (-) IgG (+): Seronegative for HPV-16 neutralizing antibodies but seropositive for HPV-16 IgG antibodies; Neu (+) IgG (-): Seropositive for HPV-16 neutralizing antibodies but seronegative for HPV-16 IgG antibodies; Neu (+) IgG (+): Seropositive for both HPV-16 neutralizing and IgG antibodies.

# Adjusted for continuous age at enrolment.



**Table S7. The risk of newly detected HPV-52 infection according to HPV-16/18 serostatus.**

| HPV-16/18 serostatus*                                 | No. of Participants | Person-years | No. of events | HPV-52 incidence (95%CI) per 100 person-years | Hazard ratio (95%CI) | P Value | Adjusted Hazard ratio (95% CI) <sup>#</sup> | P Value <sup>#</sup> |
|-------------------------------------------------------|---------------------|--------------|---------------|-----------------------------------------------|----------------------|---------|---------------------------------------------|----------------------|
| <b>Endpoint: HPV-52 incident infection</b>            |                     |              |               |                                               |                      |         |                                             |                      |
| HPV-16/18 Neu (-)                                     | 2894                | 14,593       | 249           | 1.71 (1.51, 1.93)                             | 1.00                 | ..      | 1.00                                        | ..                   |
| HPV-16/18 Neu (+)                                     | 495                 | 2399         | 58            | 2.42 (1.87, 3.13)                             | 1.43 (1.07, 1.90)    | 0.0145  | 1.44 (1.08, 1.91)                           | 0.0132               |
| HPV-16/18 IgG (-)                                     | 2117                | 10,653       | 199           | 1.87 (1.63, 2.15)                             | 1.00                 | ..      | 1.00                                        | ..                   |
| HPV-16/18 IgG (+)                                     | 1272                | 6339         | 108           | 1.70 (1.41, 2.06)                             | 0.92 (0.73, 1.16)    | 0.4890  | 0.91 (0.72, 1.15)                           | 0.4481               |
| HPV-16/18 Neu (-) IgG (-)                             | 1963                | 9925         | 176           | 1.77 (1.53, 2.06)                             | 1.00                 | ..      | 1.00                                        | ..                   |
| HPV-16/18 Neu (-) IgG (+)                             | 1025                | 5103         | 85            | 1.67 (1.35, 2.06)                             | 0.95 (0.74, 1.23)    | 0.7100  | 0.94 (0.73, 1.22)                           | 0.6550               |
| HPV-16/18 Neu (+) IgG (-)                             | 184                 | 877          | 25            | 2.85 (1.93, 4.22)                             | 1.67 (1.10, 2.54)    | 0.0169  | 1.68 (1.11, 2.56)                           | 0.0149               |
| HPV-16/18 Neu (+) IgG (+)                             | 323                 | 1584         | 34            | 2.15 (1.53, 3.00)                             | 1.21 (0.84, 1.75)    | 0.3057  | 1.21 (0.84, 1.75)                           | 0.3071               |
| <b>Endpoint: 6-month persistent HPV-52 infection</b>  |                     |              |               |                                               |                      |         |                                             |                      |
| HPV-16/18 Neu (-)                                     | 2854                | 14,794       | 92            | 0.62 (0.51, 0.76)                             | 1.00                 | ..      | 1.00                                        | ..                   |
| HPV-16/18 Neu (+)                                     | 479                 | 2465         | 20            | 0.81 (0.52, 1.26)                             | 1.30 (0.80, 2.10)    | 0.2927  | 1.30 (0.80, 2.11)                           | 0.2904               |
| HPV-16/18 IgG (-)                                     | 2082                | 10,794       | 74            | 0.69 (0.55, 0.86)                             | 1.00                 | ..      | 1.00                                        | ..                   |
| HPV-16/18 IgG (+)                                     | 1251                | 6465         | 38            | 0.59 (0.43, 0.81)                             | 0.85 (0.58, 1.26)    | 0.4250  | 0.85 (0.58, 1.26)                           | 0.4210               |
| HPV-16/18 Neu (-) IgG (-)                             | 1933                | 10,050       | 65            | 0.65 (0.51, 0.82)                             | 1.00                 | ..      | 1.00                                        | ..                   |
| HPV-16/18 Neu (-) IgG (+)                             | 1013                | 5206         | 32            | 0.61 (0.43, 0.87)                             | 0.94 (0.62, 1.44)    | 0.7844  | 0.94 (0.62, 1.44)                           | 0.7758               |
| HPV-16/18 Neu (+) IgG (-)                             | 179                 | 896          | 10            | 1.12 (0.60, 2.07)                             | 1.69 (0.87, 3.29)    | 0.1215  | 1.70 (0.87, 3.30)                           | 0.1196               |
| HPV-16/18 Neu (+) IgG (+)                             | 312                 | 1630         | 11            | 0.67 (0.37, 1.22)                             | 1.04 (0.55, 1.97)    | 0.9055  | 1.04 (0.55, 1.97)                           | 0.9036               |
| <b>Endpoint: 12-month persistent HPV-52 infection</b> |                     |              |               |                                               |                      |         |                                             |                      |
| HPV-16/18 Neu (-)                                     | 2825                | 14,820       | 73            | 0.49 (0.39, 0.62)                             | 1.00                 | ..      | 1.00                                        | ..                   |
| HPV-16/18 Neu (+)                                     | 475                 | 2487         | 13            | 0.52 (0.30, 0.90)                             | 1.06 (0.59, 1.91)    | 0.8568  | 1.06 (0.59, 1.91)                           | 0.8455               |

| HPV-16/18 serostatus*     | No. of Participants | Person-years | No. of events | HPV-52 incidence (95% CI) per 100 person-years | Hazard ratio (95% CI) | P Value | Adjusted Hazard ratio (95% CI) # | P Value # |
|---------------------------|---------------------|--------------|---------------|------------------------------------------------|-----------------------|---------|----------------------------------|-----------|
| HPV-16/18 IgG (-)         | 2063                | 10,837       | 55            | 0.51 (0.39, 0.66)                              | 1.00                  | ..      | 1.00                             | ..        |
| HPV-16/18 IgG (+)         | 1237                | 6469         | 31            | 0.48 (0.34, 0.68)                              | 0.94 (0.61, 1.46)     | 0.7864  | 0.94 (0.60, 1.45)                | 0.7700    |
| HPV-16/18 Neu (-) IgG (-) | 1915                | 10,077       | 50            | 0.50 (0.38, 0.65)                              | 1.00                  | ..      | 1.00                             | ..        |
| HPV-16/18 Neu (-) IgG (+) | 1002                | 5216         | 26            | 0.50 (0.34, 0.73)                              | 1.00 (0.62, 1.60)     | 0.9953  | 0.99 (0.62, 1.59)                | 0.9735    |
| HPV-16/18 Neu (+) IgG (-) | 178                 | 917          | 5             | 0.55 (0.23, 1.31)                              | 1.08 (0.43, 2.71)     | 0.8671  | 1.09 (0.43, 2.73)                | 0.8551    |
| HPV-16/18 Neu (+) IgG (+) | 309                 | 1635         | 8             | 0.49 (0.24, 0.98)                              | 0.98 (0.47, 2.08)     | 0.9664  | 0.99 (0.47, 2.08)                | 0.9722    |

\* HPV16/18 Neu (-): Seronegative for both HPV-16 and HPV-18 neutralizing antibodies; HPV16/18 Neu (+): Seropositive for HPV-16 and/or HPV-18 neutralizing antibodies; HPV16/18 IgG (-): Seronegative for both HPV-16 and HPV-18 IgG antibodies; HPV16/18 IgG (+): Seropositive for HPV-16 and/or HPV-18 IgG antibodies; HPV16/18 Neu (-) IgG (-): Seronegative for both HPV-16 neutralizing and IgG antibodies and seronegative for both HPV-18 neutralizing and IgG antibodies; HPV16/18 Neu (-) IgG (+): Seronegative for HPV-16 neutralizing antibodies but seropositive for HPV-16 IgG antibodies and/or seronegative for HPV-18 neutralizing antibodies but seropositive for HPV-18 IgG antibodies; HPV16/18 Neu (+) IgG (-): Seropositive for HPV-16 neutralizing antibodies but seronegative for HPV-16 IgG antibodies and/or seropositive for HPV-18 neutralizing antibodies but seronegative for HPV-18 IgG antibodies; HPV16/18 Neu (+) IgG (+): Seropositive for both HPV-16 neutralizing and IgG antibodies and/or seropositive for both HPV-18 neutralizing and IgG antibodies;

# Adjusted for continuous age at enrolment.

NA: Not available;
