# Supplementary material for: Naturally acquired HPV antibodies against subsequent homotypic infection: A large-scale prospective cohort study
Source: PubMed Central journal article supplement — Lancet Reg Health West Pac. 2021 Jul 16;13:100196. doi: 10.1016/j.lanwpc.2021.100196 (PMC8403914; doi:10.1016/j.lanwpc.2021.100196), 2021-07-16
Supplement: mmc2.pdf [file mmc2.pdf]

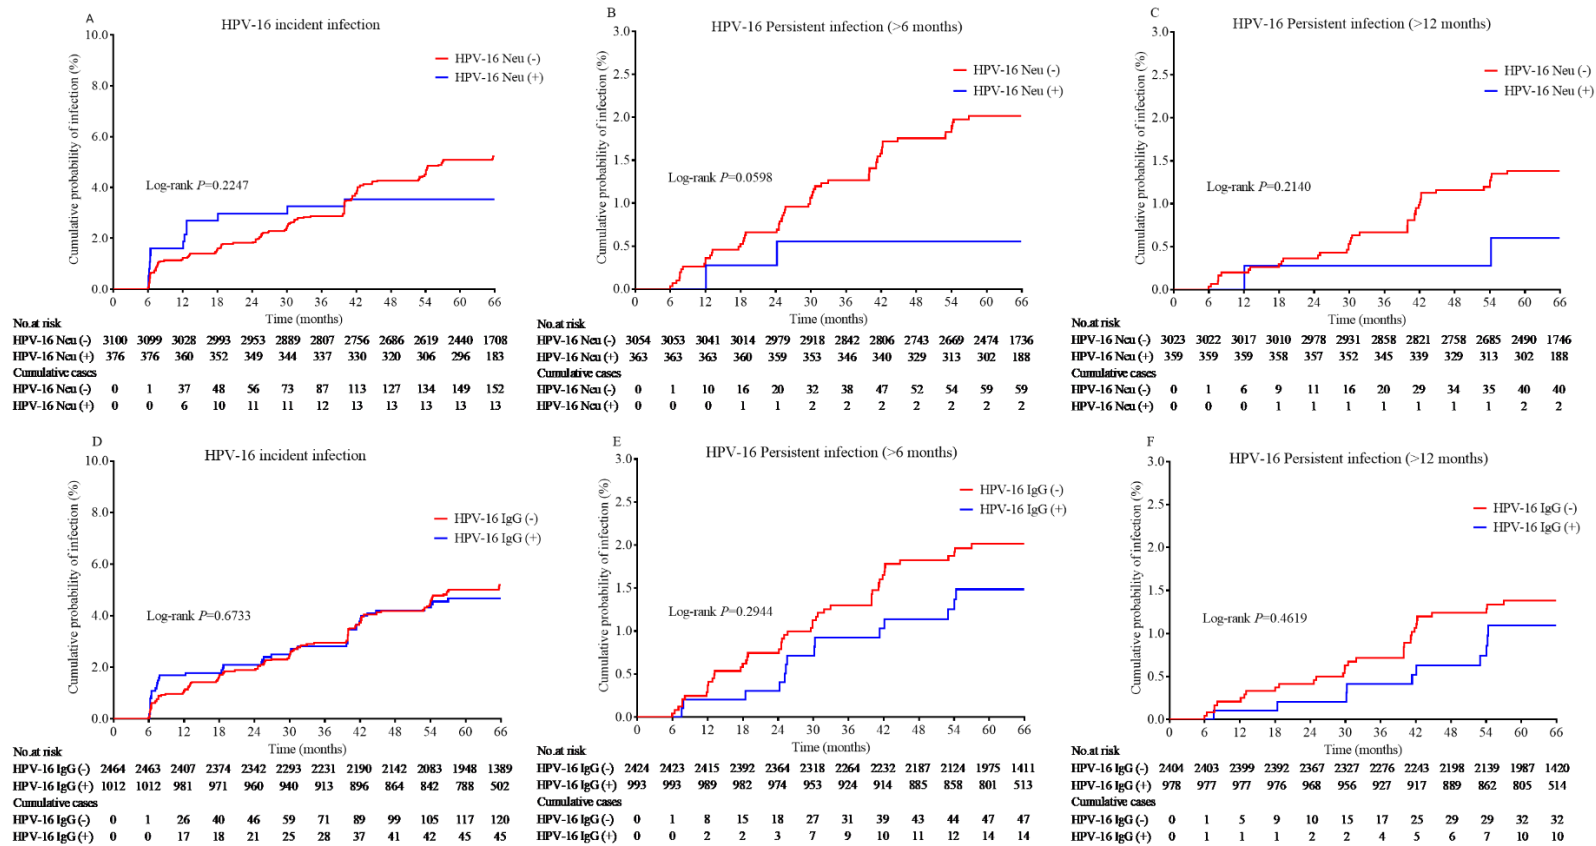

**Figure S1. Kaplan-Meier estimates of the cumulative incidence of HPV-16 incident infection (A, D) and persistent infection (>6 months) (B, E) and persistent infection (>12 months) (C, F) among different HPV-16 serostatus groups.** The log-rank test was used to analyse the differences among different serostatuses. HPV-16 Neu (-): seronegative for HPV-16 neutralizing antibodies; HPV-16 Neu (+): seropositive for HPV-16 neutralizing antibodies; HPV-16 IgG (-): seronegative for HPV-16 IgG antibodies; HPV-16 IgG (+): seropositive for HPV-16 IgG antibodies.
